# Supplementary material for: Elastomeric free-form blood vessels for interconnecting organs on chip systems
Source: Royal Society of Chemistry journal article supplement (doi:10.1039/c6lc00001k), 2016-01-01
Supplement: c6lc00001k1.pdf [file c6lc00001k1.pdf]

ARTICLE

Supplementary Information

## Elastomeric Free-Form Blood Vessels for Interconnecting Multiple Organs on Chip Systems†

Weijia Zhang<sup>1,2,3,†</sup>, Yu Shrike Zhang<sup>1,2,4,†</sup>, Syeda Mahwish Bakht<sup>1,2,5,†</sup>, Julio Aleman<sup>1,2</sup>, Kan Yue<sup>1,2</sup>, Su-Ryon Shin<sup>1,2,4</sup>, Marco Sica<sup>1,2,6</sup>, João Ribas<sup>1,2,7,8</sup>, Margaux Duchamp<sup>1,2,9</sup>, Jie Ju<sup>1,2</sup>, Ramin Banan Sadeghian<sup>1,2,10</sup>, Duckjin Kim<sup>1,2</sup>, Mehmet Remzi Dokmeci<sup>1,2,4</sup> Anthony Atala<sup>11</sup>, and Ali Khademhosseini<sup>1,2,9,12,13,\*</sup>

## ARTICLE

**Supplementary Table. S1** Elastic moduli of Elastin, PDMS, and selected commercial polymer-based materials.

| Materials                                                                             | Young's Modulus (kPa)           |
|---------------------------------------------------------------------------------------|---------------------------------|
| Elastic fiber in blood vessel                                                         | 280—500* <sup>25-28</sup>       |
| PDMS (20:1 to 3.3:1 ratio of monomer to curing agent, 70 to 190°C curing temperature) | Approx. 200—4000 <sup>†32</sup> |
| Polytetrafluoroethylene (PTFE)                                                        | 500                             |
| Polycarbonate                                                                         | 2,600                           |
| Polyvinyl chloride                                                                    | 2,900                           |

\*†see the reference paper list in the main text

## ARTICLE

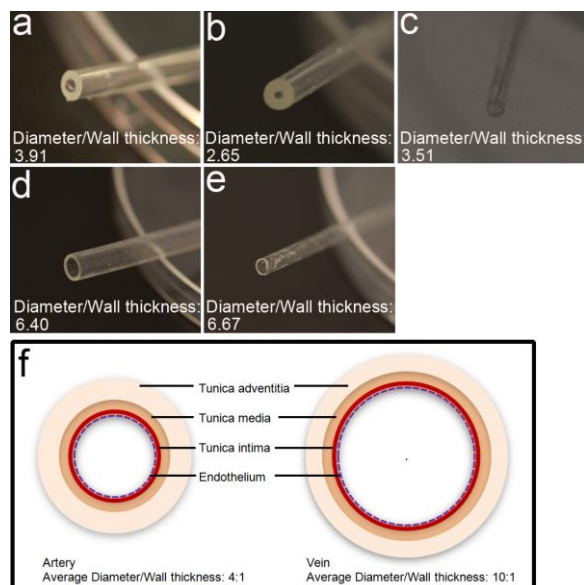

**Supplementary Fig. S1** (a-e) PDMS tubes with a range of different ratios of diameter to wall thickness. (f) Ratio range of diameter to wall thickness of human blood arteries and veins.

## ARTICLE

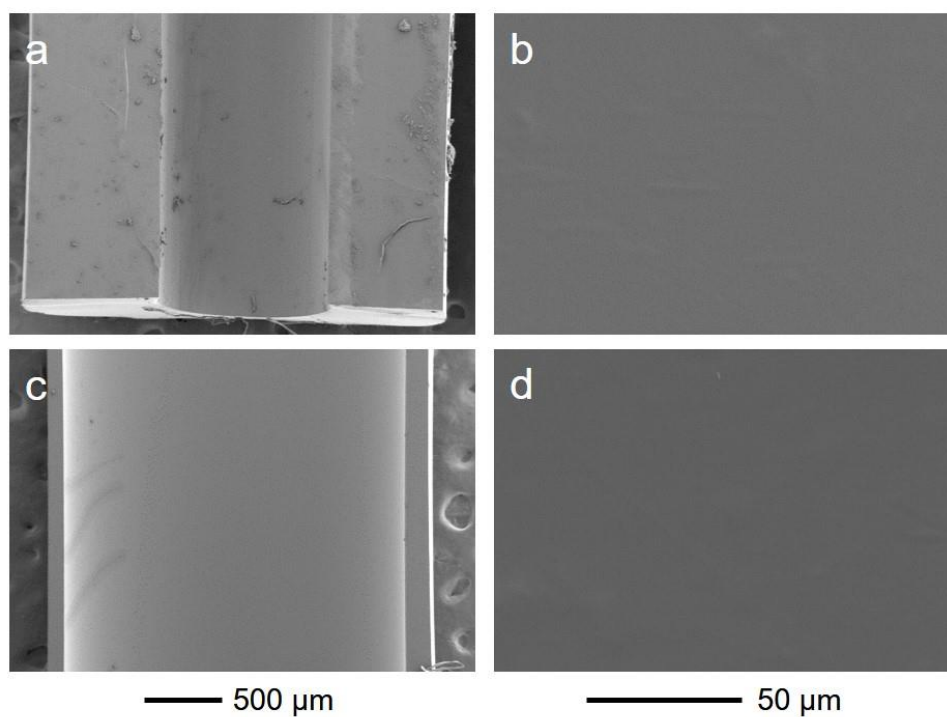

**Supplementary Fig. S2** SEM images showing the inner surface of PDMS tubes fabricated from (a, b) hard templating and (c, d) soft templating.

## ARTICLE

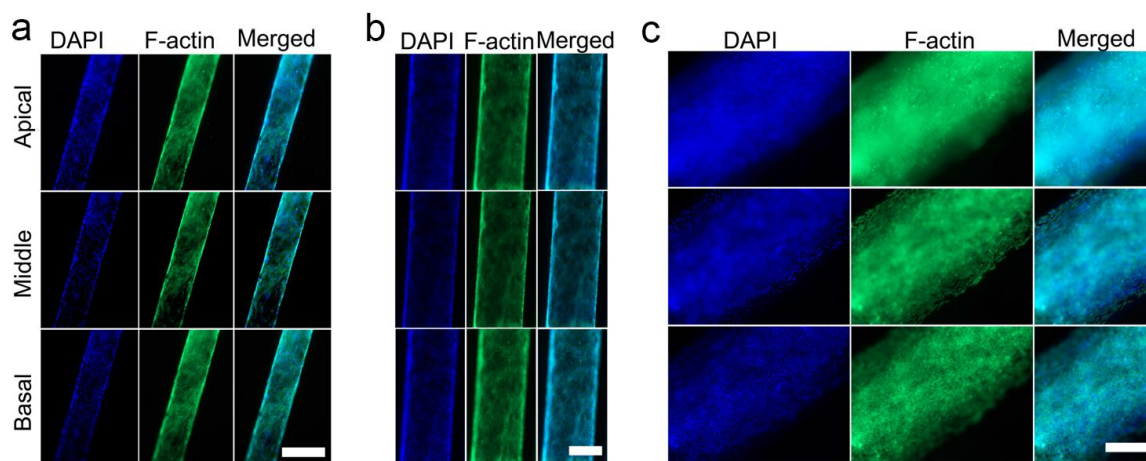

**Supplementary Fig. S3** (a-c) Fluorescence micrographs showing the endothelialized PDMS tubes with diameters of (a) 0.28 mm, (b) 0.64 mm, and (c) 1.27 mm, at the apical, middle, and basal planes, indicating the complete lumen structures.

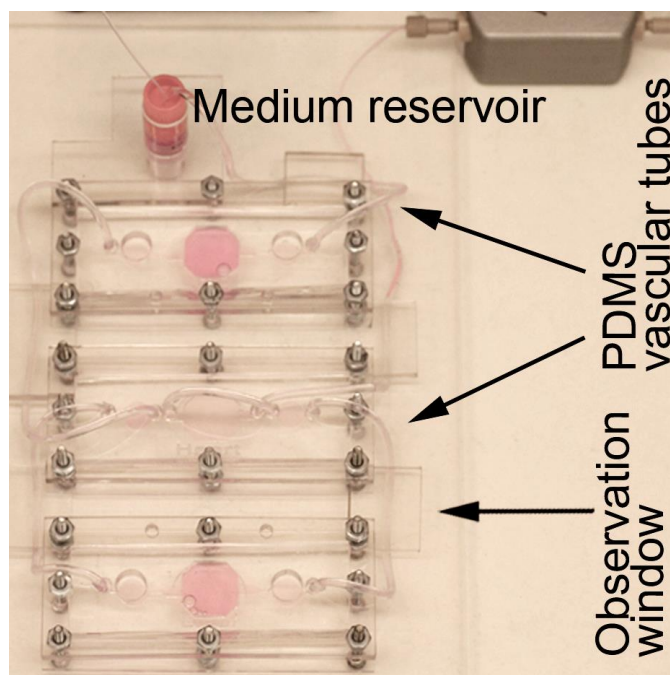

**Supplementary Fig. S4** Top view of the integrated multiple organs on chips platform.
